# Supplementary material
Source: PubMed Central journal article supplement (PMC10654933)
Supplement: NIHMS1940011-supplement-Supplementary_Materials.pdf [file NIHMS1940011-supplement-Supplementary_Materials.pdf]

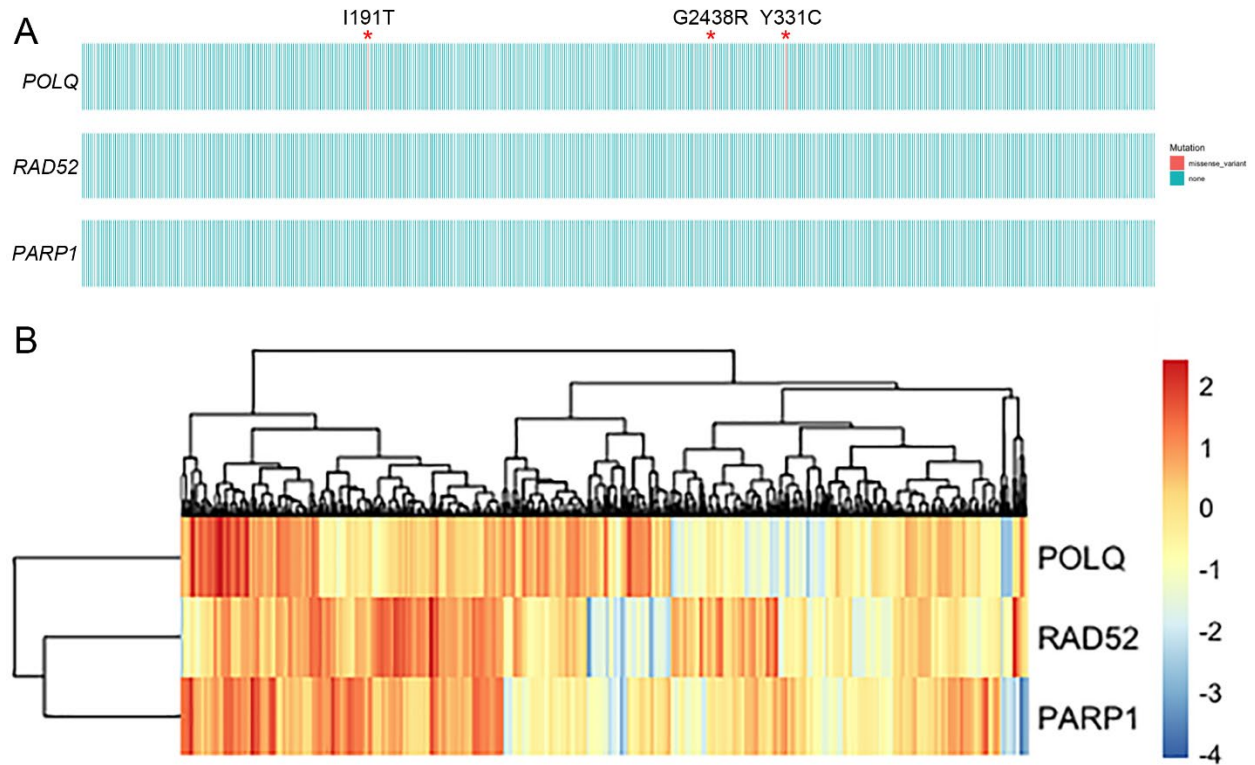

**Supplementary Figure 1. Genetic aberrations and mRNA expression variabilities of *POLQ*, *PARP1* and *RAD52* do not coexist in 519 AML samples from the BEAT-AML cohort (<https://www.vizome.org/aml/>). (A) Matrix showing mutations in *POLQ*, *RAD52*, and *PARP1* genes. (B) Genewise-scaled variance stabilizing transformation (VST) normalized gene expression of *POLQ*, *RAD52*, and *PARP1*.**

**A**

| Tissue                                              | Parameter             | Unit                  | +/+ (n=6) |          | <i>Polq</i> <sup>-/-</sup> (n=6) |          | <i>Parp1</i> <sup>-/-</sup> (n=4) |         | <i>Rad52</i> <sup>-/-</sup> (n=3) |         | <i>Polq</i> <sup>-/-</sup> ; <i>Parp1</i> <sup>-/-</sup> (n=4) |        | <i>Polq</i> <sup>-/-</sup> ; <i>Rad52</i> <sup>-/-</sup> (n=4) |         |       |
|-----------------------------------------------------|-----------------------|-----------------------|-----------|----------|----------------------------------|----------|-----------------------------------|---------|-----------------------------------|---------|----------------------------------------------------------------|--------|----------------------------------------------------------------|---------|-------|
|                                                     |                       |                       | Average   | Stdev    | Average                          | Stdev    | Average                           | Stdev   | Average                           | Stdev   | Average                                                        | Stdev  | Average                                                        | Stdev   |       |
| Peripheral blood                                    | WBC                   | K/uL                  | 11.773    | 3.256    | 13.433                           | 4.403    | 14.747                            | 3.279   | 13.047                            | 2.885   | 14.140                                                         | 7.691  | 10.895                                                         | 3.647   |       |
|                                                     | NE#                   | K/uL                  | 3.400     | 2.007    | 3.378                            | 1.040    | 3.173                             | 1.141   | 2.753                             | 0.560   | 3.713                                                          | 3.679  | 3.903                                                          | 2.474   |       |
|                                                     | LY#                   | K/uL                  | 7.513     | 1.211    | 9.268                            | 3.024    | 9.693                             | 1.259   | 8.727                             | 1.867   | 9.355                                                          | 3.298  | 5.963                                                          | 1.727   |       |
|                                                     | MO#                   | K/uL                  | 0.570     | 0.170    | 0.598                            | 0.318    | 0.847                             | 0.263   | 0.690                             | 0.176   | 0.605                                                          | 0.308  | 0.490                                                          | 0.194   |       |
|                                                     | EO#                   | K/uL                  | 0.253     | 0.153    | 0.145                            | 0.110    | 0.833                             | 0.498   | 0.680                             | 0.208   | 0.363                                                          | 0.448  | 0.385                                                          | 0.348   |       |
|                                                     | BA#                   | K/uL                  | 0.085     | 0.053    | 0.043                            | 0.027    | 0.363                             | 0.185   | 0.197                             | 0.116   | 0.105                                                          | 0.157  | 0.155                                                          | 0.162   |       |
|                                                     | RBC                   | M/uL                  | 10.253    | 0.478    | 9.723                            | 0.433    | 8.947                             | 0.690   | 9.547                             | 0.241   | 9.553                                                          | 0.440  | 10.153                                                         | 0.683   |       |
|                                                     | HB                    | g/dL                  | 12.900    | 0.231    | 12.450                           | 0.812    | 13.433                            | 0.153   | 12.633                            | 0.833   | 12.625                                                         | 1.162  | 13.975                                                         | 2.087   |       |
|                                                     | HCT                   | %                     | 45.917    | 2.250    | 46.950                           | 3.256    | 47.533                            | 2.065   | 49.033                            | 5.258   | 47.825                                                         | 8.357  | 55.525                                                         | 8.446   |       |
|                                                     | MCV                   | fL                    | 44.783    | 0.100    | 48.283                           | 2.150    | 53.300                            | 3.666   | 51.433                            | 6.700   | 49.950                                                         | 6.575  | 54.550                                                         | 5.884   |       |
|                                                     | MCH                   | Pg                    | 12.600    | 0.557    | 12.817                           | 0.588    | 15.100                            | 1.389   | 13.267                            | 1.234   | 13.225                                                         | 0.750  | 13.725                                                         | 1.239   |       |
|                                                     | PLT                   | K/uL                  | 701.667   | 54.580   | 896.333                          | 142.813  | 645.333                           | 111.159 | 690.667                           | 234.180 | 785.500                                                        | 75.677 | 752.750                                                        | 136.133 |       |
|                                                     | Bone marrow           | Gr1+                  | % PBL     | 10.620   | 4.236                            | 11.972   | 4.006                             | 7.225   | 2.138                             | 12.620  | 5.054                                                          | 13.000 | 5.650                                                          | 7.825   | 0.895 |
|                                                     |                       | Mac1+                 | % PBL     | 26.600   | 15.387                           | 21.550   | 5.995                             | 15.925  | 12.170                            | 21.660  | 4.133                                                          | 28.033 | 5.416                                                          | 26.375  | 8.548 |
| CD3+                                                |                       | % PBL                 | 26.600    | 15.897   | 25.225                           | 7.104    | 30.825                            | 7.454   | 33.880                            | 8.175   | 21.233                                                         | 5.772  | 24.125                                                         | 15.923  |       |
| B220+                                               |                       | % PBL                 | 31.160    | 9.036    | 27.875                           | 4.647    | 24.050                            | 6.153   | 29.680                            | 6.855   | 28.700                                                         | 3.905  | 24.075                                                         | 2.587   |       |
| Lin <sup>c</sup> Kit <sup>+</sup>                   |                       | % of Lin <sup>-</sup> | 19.232    | 2.413    | 18.74833                         | 4.117866 | 17.150                            | 8.613   | 17.867                            | 0.802   | 16.375                                                         | 1.410  | 16.875                                                         | 3.308   |       |
| Lin <sup>c</sup> Sca1 <sup>+</sup>                  | % of Lin <sup>-</sup> | 17.065                | 1.443     | 14.36333 | 4.924882                         | 16.225   | 9.896                             | 14.433  | 6.512                             | 16.725  | 6.278                                                          | 18.725 | 8.732                                                          |         |       |
| Lin <sup>c</sup> Kit <sup>+</sup> Sca1 <sup>+</sup> | % of Lin <sup>-</sup> | 4.200                 | 1.378     | 2.906667 | 1.229661                         | 5.400    | 5.095                             | 3.467   | 1.250                             | 3.825   | 1.382                                                          | 5.200  | 3.342                                                          |         |       |

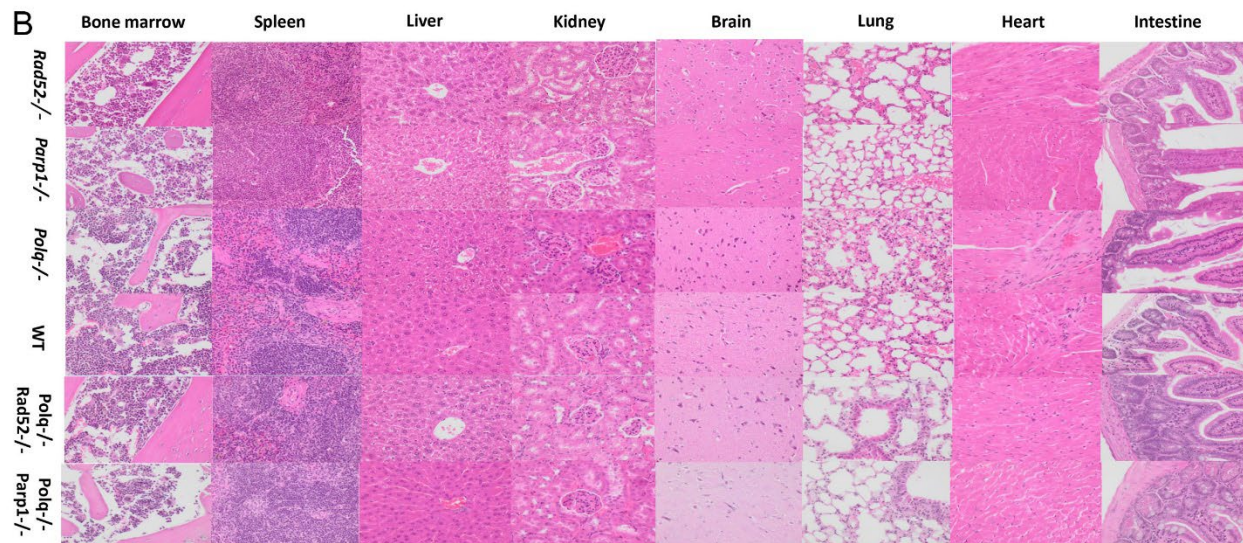

**Supplementary Figure 2. Phenotype of *Polq*<sup>-/-</sup>;*Parp1*<sup>-/-</sup> and *Polq*<sup>-/-</sup>;*Rad52*<sup>-/-</sup> mice. (A)** Peripheral blood and bone marrow parameters in 3–4 months old male and female mice (n = number of mice/genotype). **(B)** H&E-stained tissue sections (bone marrow, spleen, liver, kidney, brain, lung, heart, and bowel) with no specific pathologic changes (40x).

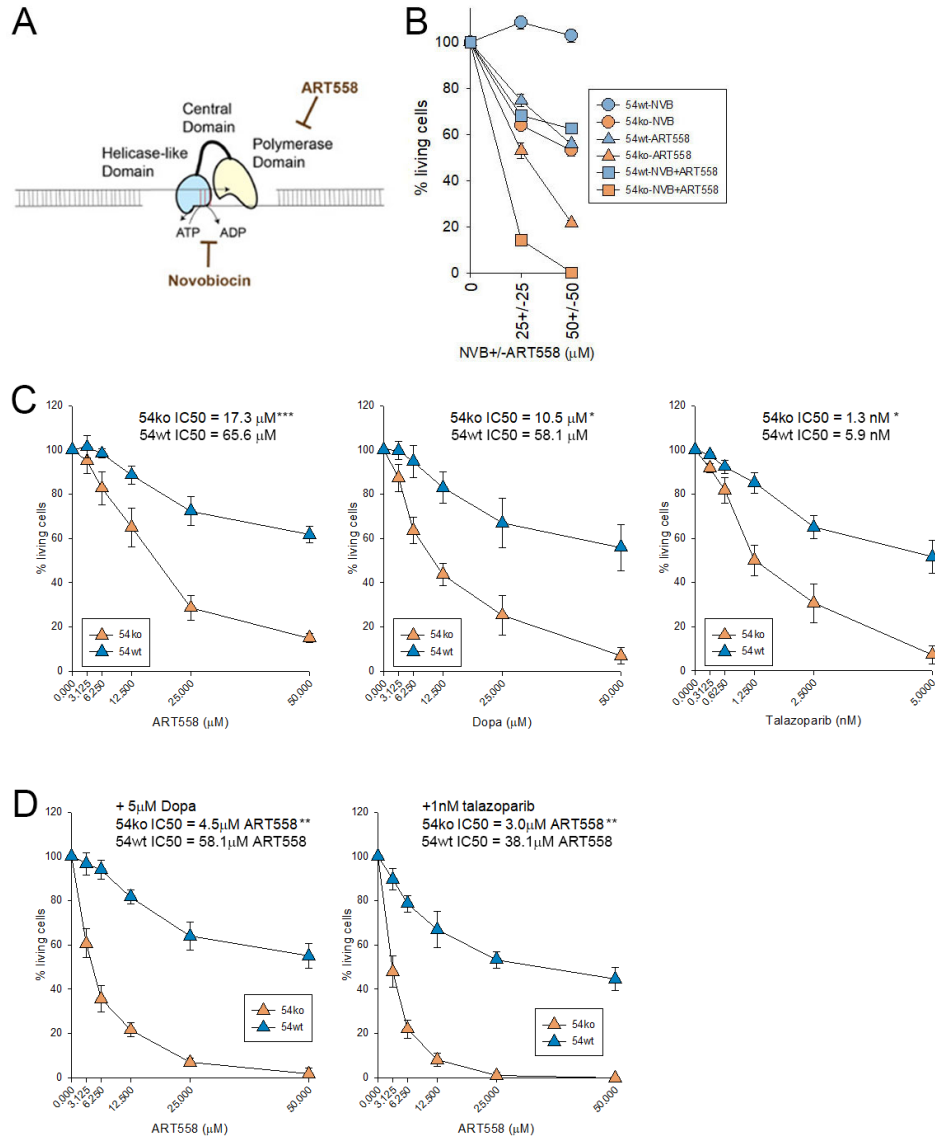

**Supplementary Figure 3. Simultaneous inhibition of Pol $\theta$  helicase and DNA polymerase activity exerted synergistic effect against *RAD54*<sup>-/-</sup> leukemia cells. (A) A scheme illustrating how novobiocin (NVB) and ART558 inhibit Pol $\theta$ . (B-D) Nalm6 (54wt) and Nalm6-*RAD54*<sup>-/-</sup> (54ko) cells were treated for 72 hrs with the indicated concentrations of: (B) novobiocin (NVB) and ART558. (C) ART558, 6-hydroxy-DL-dopa (Dopa), talazoparib, and (D) ART558 + Dopa and ART558 + talazoparib. Results show mean %  $\pm$  SD of living cells  $\pm$  SD when compared to untreated cells (B, C) and cells treated with the indicated concentrations of Dopa or talazoparib (D). IC<sub>50</sub> were calculated using Excel. \*, \*\*, \*\*\* in comparison to 54wt.**

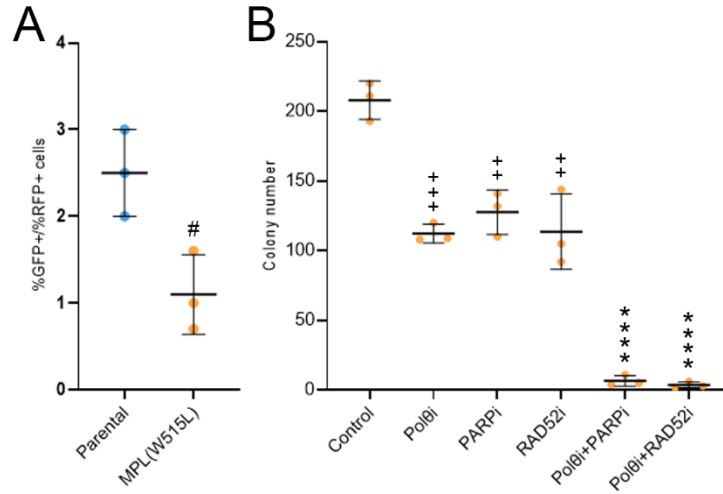

**Supplementary Figure 4. Targeting Polθ + PARP and Polθ + RAD52 induced dual synthetic lethality against HR-deficient MPN cells.** (A) HR activity in in 32Dcl3 parental cells and isogenic MPL(W515L) cells. Results represent mean % ± SD of GFP+ cells in RFP+ cells. (B) Lin-CD34+ HR-deficient MPL(W515L)-positive primary MPN cells (n=1) were treated with IC<sub>50</sub> of Polθi ART558, PARPi olaparib, and RAD52i 6-hydroxy-DL-dopa and with the indicated combinations. Mean ± SD colony numbers from triplicate experiment. Statistical significance when compared to: # another group, + control, and \* corresponding individual treatments.

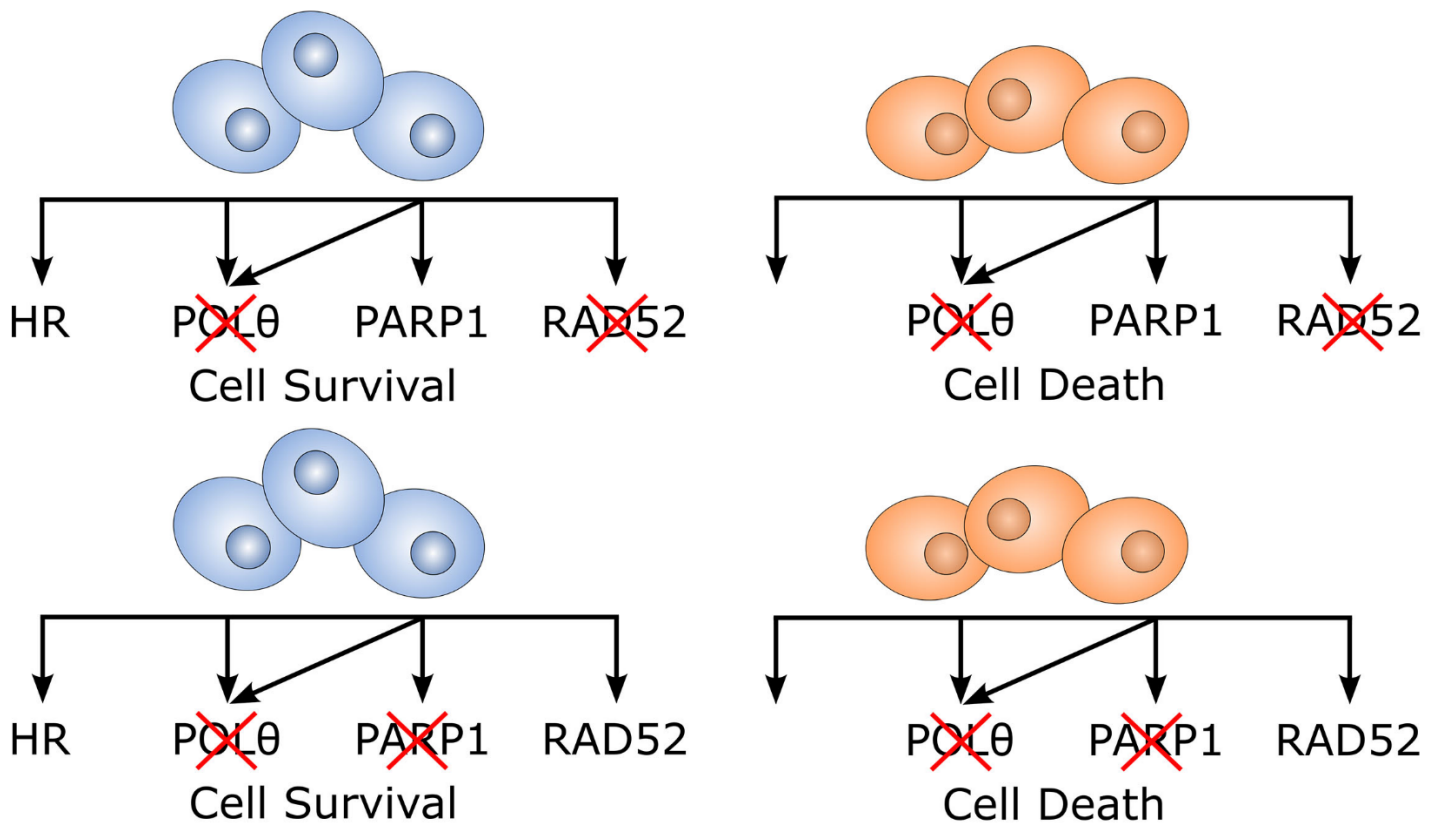

**Supplementary Figure 5. Targeting Polθ + PARP1 and Polθ + RAD52 induced dual synthetic lethality against HR-deficient leukemia cells.** A diagram illustrating the model of dual synthetic lethal interactions after targeting Polθ and PARP1 or Polθ and RAD52 in HR-deficient cells (orange) versus HR-proficient cells (blue).
